# Supplementary material for: Identification and characterisation of a phospholipid scramblase in the malaria parasite Plasmodium falciparum
Source: PubMed Central journal article supplement (PMC8202325; doi:10.1016/j.molbiopara.2021.111374), 2021-05
Supplement: mmc1.pdf [file mmc1.pdf]

Figure S1

|                   |                                                                                                                                                                                                           |     |
|-------------------|-----------------------------------------------------------------------------------------------------------------------------------------------------------------------------------------------------------|-----|
| <b>PfPLSCR</b>    | -----MEEKNIHMQPNIINYSYRNPNNMYNMNY--                                                                                                                                                                       | 26  |
| <b>VbraPLSCR2</b> | -----MKGEKGAEPQQMVMQ-----PQAYGQPQVM                                                                                                                                                                       | 25  |
| <b>VbraPLSCR1</b> | MPQQPTFPVAPKAVQPSQSPNAVPPQQIPNHAGMHPPTPINHAGFASAPPQHQMVGQ--TA                                                                                                                                             | 58  |
| <b>CvelPLSCR</b>  | -----                                                                                                                                                                                                     | 0   |
| <b>PfPLSCR</b>    | HN <b>P</b> I <b>V</b> P <b>P</b> PPQQMQLFVNDWKSIL <b>SPM</b> <b>Q</b> <b>T</b> <b>C</b> <b>K</b> <b>I</b> <b>K</b> <b>Q</b> <b>Q</b> <b>F</b> <b>D</b> <b>D</b> <b>R</b> E <b>F</b> VADYFMGFKLDFNNKYLILD | 86  |
| <b>VbraPLSCR2</b> | QPVAQMMPGMMVINTDPWAILSGMTGAEIKERVVM----AEAILGW--EQNNIYDIKD                                                                                                                                                | 79  |
| <b>VbraPLSCR1</b> | TAADAPTNPAMALGSPDPFIALSGMNKVQVSEKVR-----LEAVIGW--EQNNVFRIKN                                                                                                                                               | 112 |
| <b>CvelPLSCR</b>  | -----MQFTMDPFQMLASQQKVYVKEKIKI----L-EFIGI--DQANKYAVKD                                                                                                                                                     | 41  |
|                   | * * : : : : : : * : * : : :                                                                                                                                                                               |     |
| <b>PfPLSCR</b>    | ASTELMKFTACEKSEFCYR----NCLPKICIPMNMKILS--YGKEISKPDILMEKDCTCT                                                                                                                                              | 140 |
| <b>VbraPLSCR2</b> | QNG-NPAFIAKEDTDTCTRLIG <b>CC</b> PVQDCRMFKLDISVPPMPGASPPFFLHLDRPWTCT                                                                                                                                      | 138 |
| <b>VbraPLSCR1</b> | EFG-ADVMVAKEETEWEYKR----N <b>C</b> CLGDCRPWDVDVALCPVAGAPPAPFIHLQRKWSLT                                                                                                                                    | 167 |
| <b>CvelPLSCR</b>  | VNG-NEMFIAKETTGFCA <b>R</b> ---- <b>C</b> CLPTTCRPFNLEMF- <b>I</b> KVPGSQPQFFIKADKE <b>C</b> QMT                                                                                                          | 95  |
|                   | : * * : * * * * : : : * : : : *                                                                                                                                                                           |     |
| <b>PfPLSCR</b>    | FLCFNRPTIKMYDFSNNNNKELIGTIKTPYR <b>CC</b> SYNFNLFDPSSNNKIMYMDDT <b>CC</b> QMSIL                                                                                                                           | 200 |
| <b>VbraPLSCR2</b> | CYCFNRPKVTVTDLTA--GGEVIGTMRDPWH <b>CC</b> NYNMRMADPEGKDVLNVEAS <b>CC</b> QCGFW                                                                                                                            | 196 |
| <b>VbraPLSCR1</b> | <b>CC</b> CIGRPKVTVDVTT--N-QKLSVSDPWH <b>CC</b> DVTFVIRDHQGRKIMRVRGGGCQCGW <b>C</b>                                                                                                                       | 224 |
| <b>CvelPLSCR</b>  | <b>CC</b> CLNRPKMVMNHT--G-QQIGILKDDFD <b>CC</b> NHIFSINDNQENPTLRIKGNMOCG <b>I</b> C                                                                                                                       | 152 |
|                   | * : . * * : : : : : : * : : * * : : * . . : : * .                                                                                                                                                         |     |
| <b>PfPLSCR</b>    | CPCPWGPFKYSNFFLRDANSKEKIAHL <b>R</b> KEVP-- <b>FL</b> KFVKR <b>D</b> IDNY <b>TL</b> D <b>F</b> EQVQN <b>PEW</b> <b>KM</b>                                                                                 | 258 |
| <b>VbraPLSCR2</b> | CPLPCGPCKEVQFEITDVESKQKVGHF <b>R</b> IVPC <b>N</b> LL <b>K</b> FL <b>F</b> TDVDNYQVE <b>F</b> GGITD <b>PK</b> <b>W</b> <b>K</b>                                                                           | 256 |
| <b>VbraPLSCR1</b> | <b>C</b> H <b>C</b> PCG <b>P</b> CRKIKFPV <b>F</b> DAKTGREIAS <b>I</b> R <b>H</b> EWGG-- <b>L</b> FK <b>S</b> M <b>C</b> T <b>D</b> ADDY <b>W</b> ID <b>F</b> GEVQD <b>PR</b> <b>W</b> <b>K</b> <b>S</b>  | 283 |
| <b>CvelPLSCR</b>  | <b>C</b> K <b>C</b> PCGPCKYVKFDITDMKSQQAVGQIVKENTC-LGTIADDMN <b>D</b> KY <b>W</b> VD <b>F</b> GAVSE <b>P</b> Q <b>W</b> <b>K</b> <b>A</b>                                                                 | 211 |
|                   | * * * * : : * : * : : : : : : : : : * . * : : * : : * . * *                                                                                                                                               |     |
| <b>PfPLSCR</b>    | <b>ML</b> L <b>A</b> F <b>A</b> L <b>F</b> L <b>D</b> Y <b>M</b> Y <b>D</b> R <b>K</b> -----                                                                                                              | 275 |
| <b>VbraPLSCR2</b> | <b>LL</b> L <b>A</b> A <b>A</b> V <b>F</b> A <b>D</b> F <b>R</b> Y <b>F</b> S <b>T</b> N <b>K</b> NENSALGTIS                                                                                              | 284 |
| <b>VbraPLSCR1</b> | <b>LL</b> I <b>A</b> T <b>A</b> L <b>F</b> L <b>D</b> F <b>R</b> Y <b>F</b> S <b>R</b> GADGLAA-----                                                                                                       | 306 |
| <b>CvelPLSCR</b>  | <b>ML</b> V <b>T</b> A <b>A</b> I <b>F</b> I <b>D</b> F <b>R</b> M <b>F</b> Q <b>G</b> GKKDENSTG---                                                                                                       | 236 |
|                   | : * : : * : * * : : :                                                                                                                                                                                     |     |

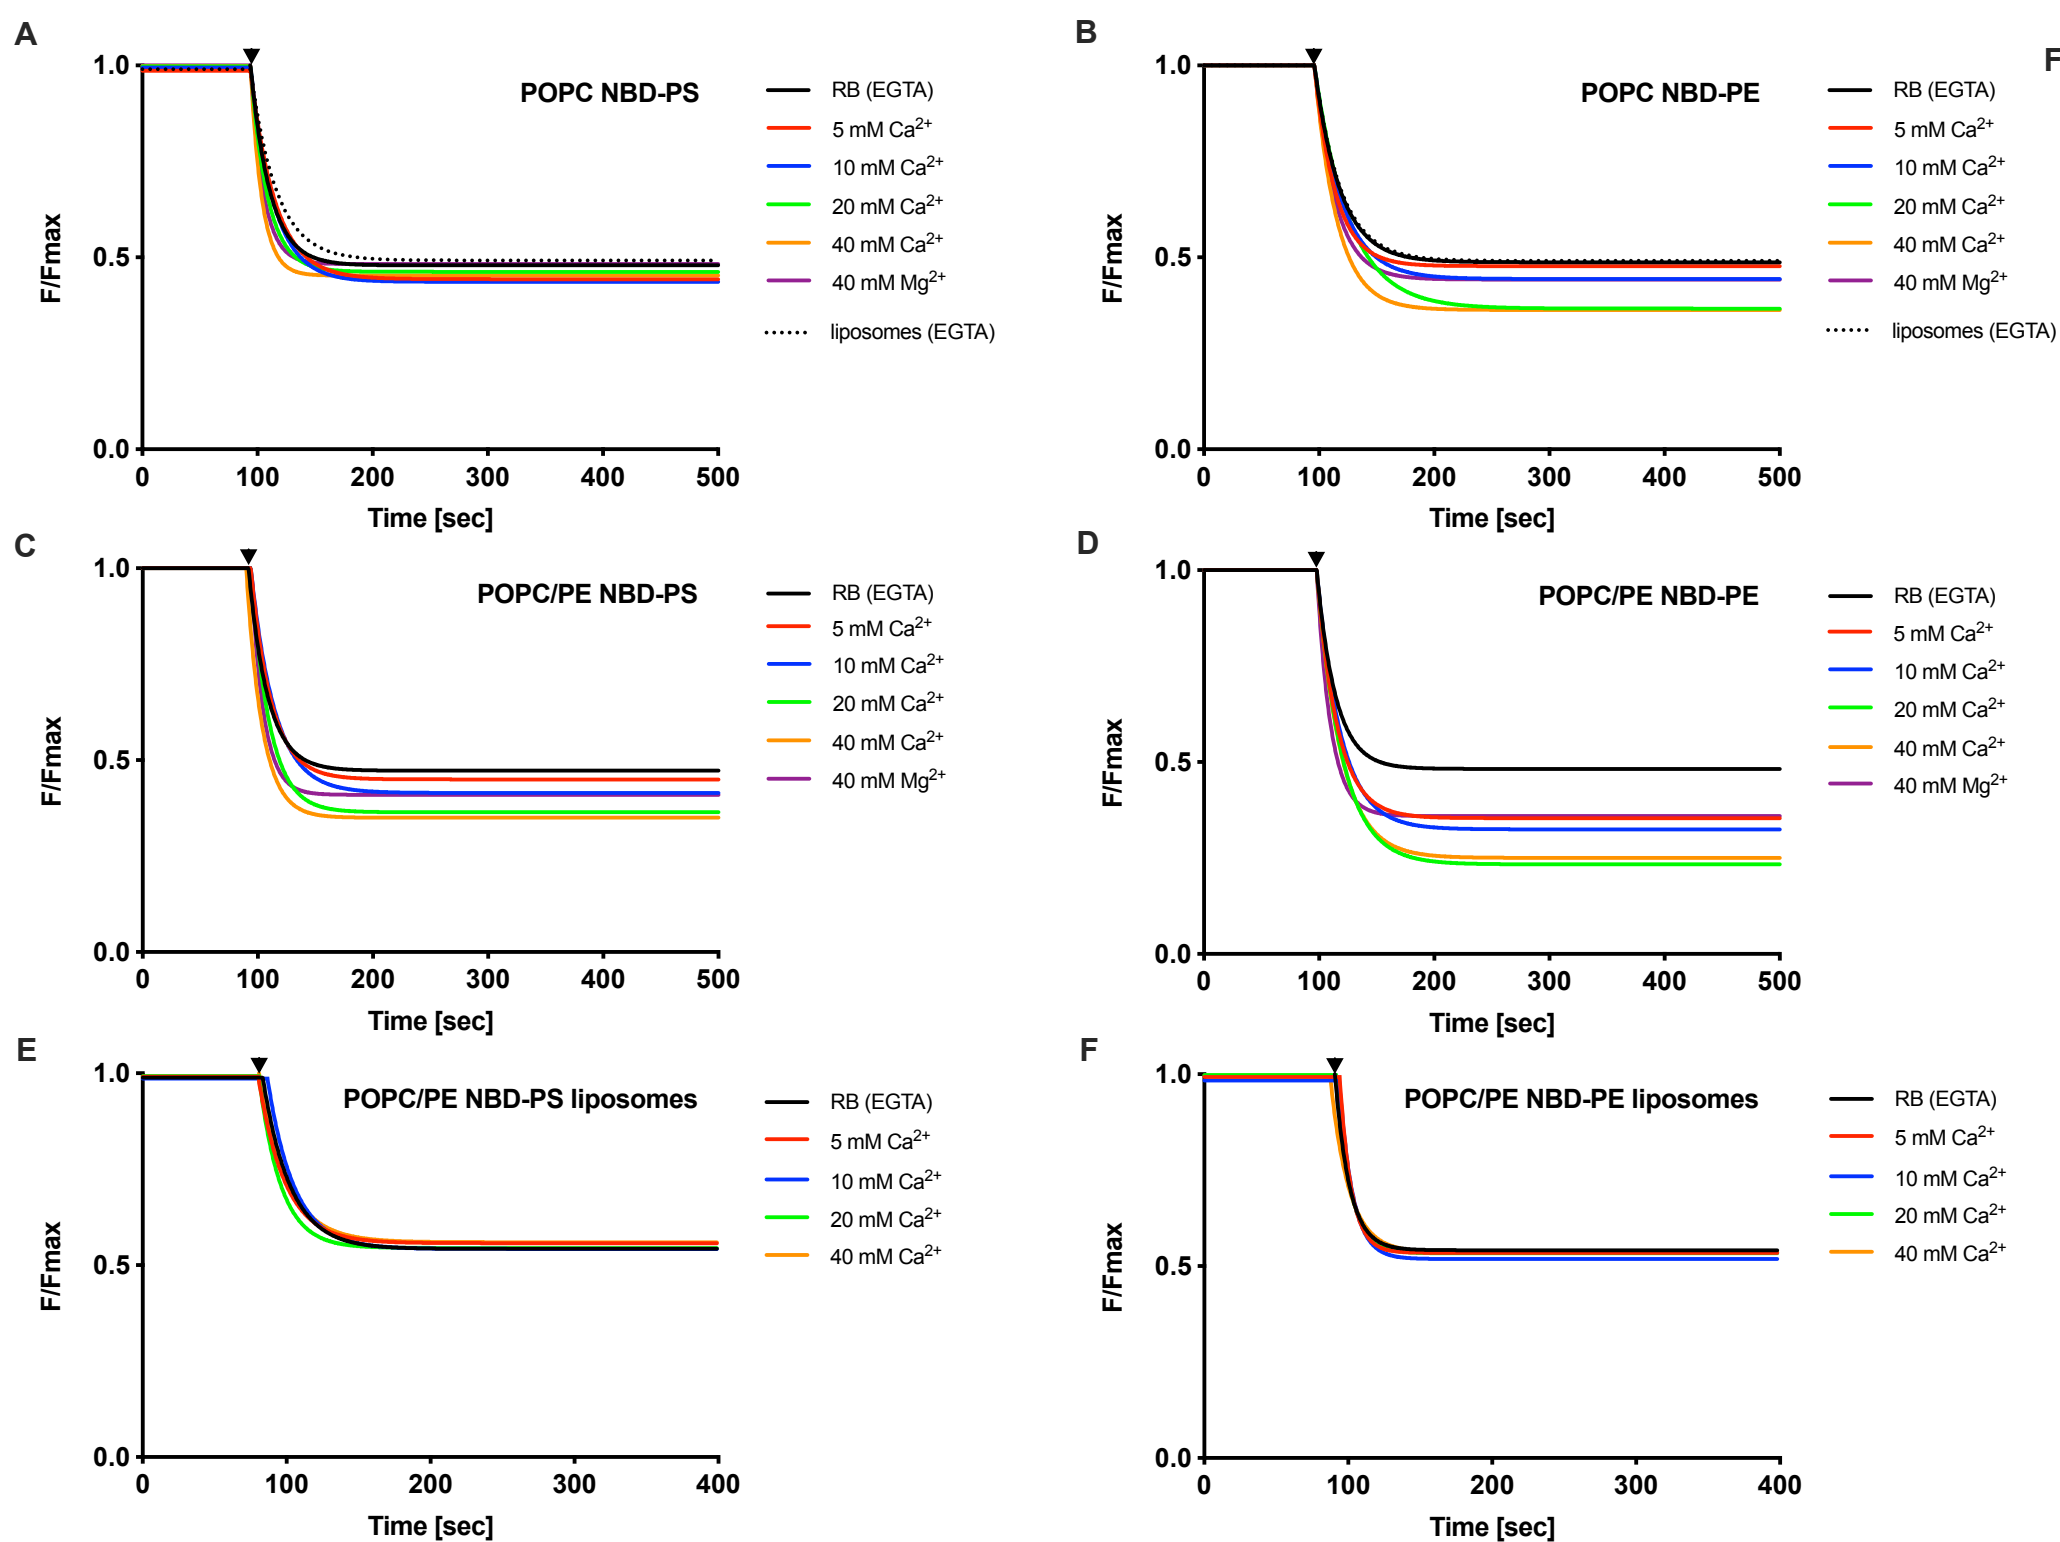

Figure S3

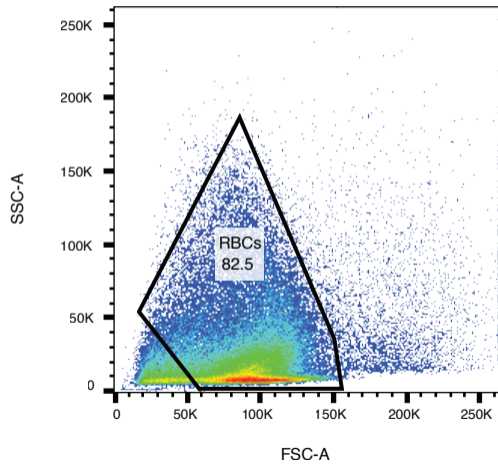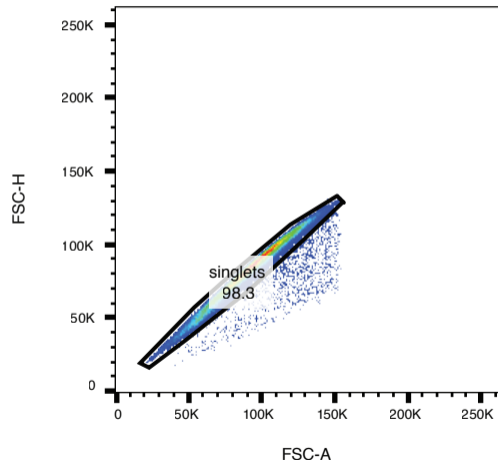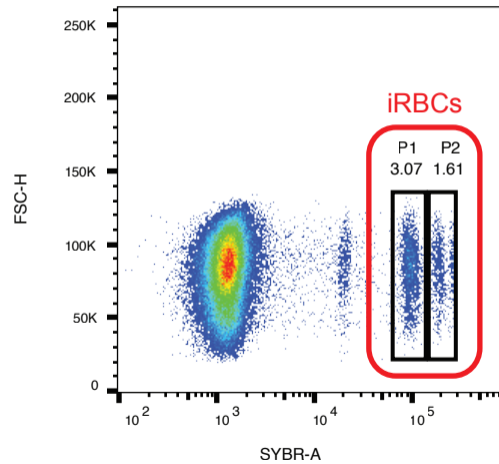

**Table S1. All primers used in the study.**

|                      |                                           |
|----------------------|-------------------------------------------|
| 1022700 cKO & KO P1  | GAACATAAAATATATTTAAAATGTTATATATACATAGATAG |
| 1022700 cKO & KO P2  | GAGAAGGTTATTGCATCCTTCAATAAAAATGGGAAAATTG  |
| NeoR P3              | GGCCAGCCACGATAGCCGCGCTGCCTCG              |
| GFP P4               | CAAGTGTTGGCCATGGAAGTGGTAGTTTTCCAGTAGTGC   |
| M13R P5              | CAGGAAACAGCTATGACCATG                     |
| 1022700 5F (XhoI)    | CGC <u>cctcgag</u> GGTATTTCCCAGGTGCTCGT   |
| 1022700 5R (HindIII) | CGC <u>aagctt</u> CATATGTATATTTTTCTCTTCC  |
| 1022700 3F (NotI)    | CGC <u>gcgccgc</u> GCTCACCTACGTAAAGAAGT   |
| 1022700 3R (SacI)    | CGC <u>gagctc</u> GGTTTAAACAAAATATGCAG    |
| guide952530 S        | TATTCGATAACTGTAATTTATATT                  |
| guide952530 AS       | AAACAATATAAATTACAGTTATCG                  |
| guide952497 S        | TATTGTGGGGGCACATAGGGTTA                   |
| guide952497 AS       | AAACTAACCCATATAGTGCCCCAC                  |
| guide951969 S        | TATTATCTTATGCCCTTGTCATG                   |
| guide951969 AS       | AAACCATGGACAAGGGCATAAGAT                  |
| 1022700 KO P6        | GACAATAAATATATTTTCTTTAACC                 |
| 1022700 KO P7        | GTGTGACATTTATGTGTAAATG                    |
| 1022700 KO P8        | GAGAATAACGACCGATATTTTATC                  |
| 1022700 KO P9        | GAACAAGAACAAAGTTCTAATTAG                  |
